# Supplementary material for: The influence of mid-latitude cyclones on European background surface ozone
Source: Copernicus journal article supplement (doi:10.5194/acp-17-12421-2017), 2017-10-19
Supplement: Supplementary file 1 [file acp-17-12421-2017-supplement.pdf]

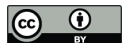

*Supplement of*

## **The influence of mid-latitude cyclones on European background surface ozone**

**K. Emma Knowland et al.**

*Correspondence to:* K. E. Knowland (k.e.knowland@nasa.gov)

The copyright of individual parts of the supplement might differ from the CC BY 3.0 License.

## **S1 The long-term relationship between cyclone frequency and extreme/baseline surface O<sub>3</sub>**

To test the sensitivity of the results to the values chosen for high and low O<sub>3</sub>, the analysis was repeated for the extreme high and low O<sub>3</sub> percentiles (O<sub>3</sub> > 95<sup>th</sup> pc and O<sub>3</sub> < 5<sup>th</sup> pc, respectively). A similar relationship between cyclone tracks and the extreme high and extreme low O<sub>3</sub> at Mace Head (Table S1) is found to the relationship between cyclone tracks and the high and low O<sub>3</sub> quartile percentiles (Table 2). The mean percentage of cyclone tracks associated with extreme high O<sub>3</sub> at Mace Head in the North (14 %) and Center (13 %) regions is greater than the mean percentage of cyclone tracks associated with extreme low O<sub>3</sub> through those two regions (8 and 11 %, respectively). In the South region, the mean percentage of cyclone tracks associated with extreme low O<sub>3</sub> at Mace Head (18 %) is greater than those associated with extreme high O<sub>3</sub> (14 %). The number of years where the percentage of cyclone tracks passing through a region are associated with extreme high O<sub>3</sub> is still greatest in the North region (14 years) and least in the South region (5 years; Table S1). Similar to the quartile percentile results, the West and East regions are evenly split, with slightly higher mean percentage of tracks associated with extreme low O<sub>3</sub> (17 %) than with extreme high O<sub>3</sub> (16 %) in the West region and a higher mean percentage of tracks associated with extreme high O<sub>3</sub> (13 %) than with extreme low O<sub>3</sub> (12 %) in the East region.

When considering the extreme high and low O<sub>3</sub> percentiles for Monte Vehlo, a different result emerges. In this case, all five regions show more tracks are associated with extreme low O<sub>3</sub> than with extreme high O<sub>3</sub> (Table S1), with 15 of the years in most regions identified by more tracks passing through a region being associated with extreme low O<sub>3</sub> than with extreme high O<sub>3</sub>, although these differences are typically not significant (Table S1).

| Mace Head   |                                                                      |                                                                                |                                                                     |                                                                               |                                        |  |
|-------------|----------------------------------------------------------------------|--------------------------------------------------------------------------------|---------------------------------------------------------------------|-------------------------------------------------------------------------------|----------------------------------------|--|
| Region      | Mean percent of tracks per season associated with $O_3 > 95^{th}$ pc | Number of years with more tracks associated with $> 95^{th}$ pc ( <i>SGF</i> ) | Mean percent of tracks per season associated with $O_3 < 5^{th}$ pc | Number of years with more tracks associated with $< 5^{th}$ pc ( <i>SGF</i> ) | Mean number of tracks per season (MAM) |  |
| North       | 14 %                                                                 | 14 (7)                                                                         | 8 %                                                                 | 9 (0)                                                                         | 32                                     |  |
| Center      | 13 %                                                                 | 12 (3)                                                                         | 11 %                                                                | 11 (1)                                                                        | 30                                     |  |
| South       | 14 %                                                                 | 5 (1)                                                                          | 18 %                                                                | 18 (3)                                                                        | 25                                     |  |
| West        | 16 %                                                                 | 9 (1)                                                                          | 17 %                                                                | 14 (3)                                                                        | 50                                     |  |
| East        | 13 %                                                                 | 10 (1)                                                                         | 12 %                                                                | 13 (1)                                                                        | 52                                     |  |
| Monte Velho |                                                                      |                                                                                |                                                                     |                                                                               |                                        |  |
| Region      | Mean percent of tracks per season associated with $O_3 > 95^{th}$ pc | Number of years with more tracks associated with $> 95^{th}$ pc ( <i>SGF</i> ) | Mean percent of tracks per season associated with $O_3 < 5^{th}$ pc | Number of years with more tracks associated with $< 5^{th}$ pc ( <i>SGF</i> ) | Mean number of tracks per season (MAM) |  |
| North       | 11 %                                                                 | 4 (0)                                                                          | 18 %                                                                | 15 (3)                                                                        | 29                                     |  |
| Center      | 14 %                                                                 | 4 (0)                                                                          | 19 %                                                                | 15 (1)                                                                        | 24                                     |  |
| South       | 22 %                                                                 | 4 (0)                                                                          | 26 %                                                                | 15 (0)                                                                        | 17                                     |  |
| West        | 22 %                                                                 | 4 (1)                                                                          | 26 %                                                                | 15 (0)                                                                        | 39                                     |  |
| East        | 18 %                                                                 | 5 (0)                                                                          | 22 %                                                                | 14 (2)                                                                        | 45                                     |  |

**Table S1. (top)** The mean percent of cyclone tracks associated with extreme  $O_3 (> 95^{th}$  pc) or baseline  $O_3 (< 5^{th}$  pc) measured at the surface at Mace Head are given based on each MAM season in the period 1988–2010. The total number of years in the 23-year period (1988–2010) which have a greater number of tracks associated with  $O_3 > 95^{th}$  pc and  $O_3 < 5^{th}$  pc. **(bottom)** The total number of those years which have a significant  $\chi^2$  difference at  $p < 0.05$  confidence interval are given in the brackets (*SGF*). See Fig. 1 for definition of the regions. The mean percent of cyclone tracks associated with extreme  $O_3 (> 95^{th}$  pc) or baseline  $O_3 (< 5^{th}$  pc) measured at the surface at Monte Velho are given based on each MAM season in the period 1989–2009 (excluding 1999 and 2005 which had insufficient data). The total number of years in the 19-year period (1989–2009, excluding 1999 and 2005) which have a greater number of tracks associated with  $O_3 > 95^{th}$  pc and  $O_3 < 5^{th}$  pc. The total number of those years which have a significant  $\chi^2$  difference at  $p < 0.05$  confidence interval are given in the brackets (*SGF*).

## S2 Additional cyclone figures

### S2.1 N1 cyclone using MERRA-2 reanalysis and STFR

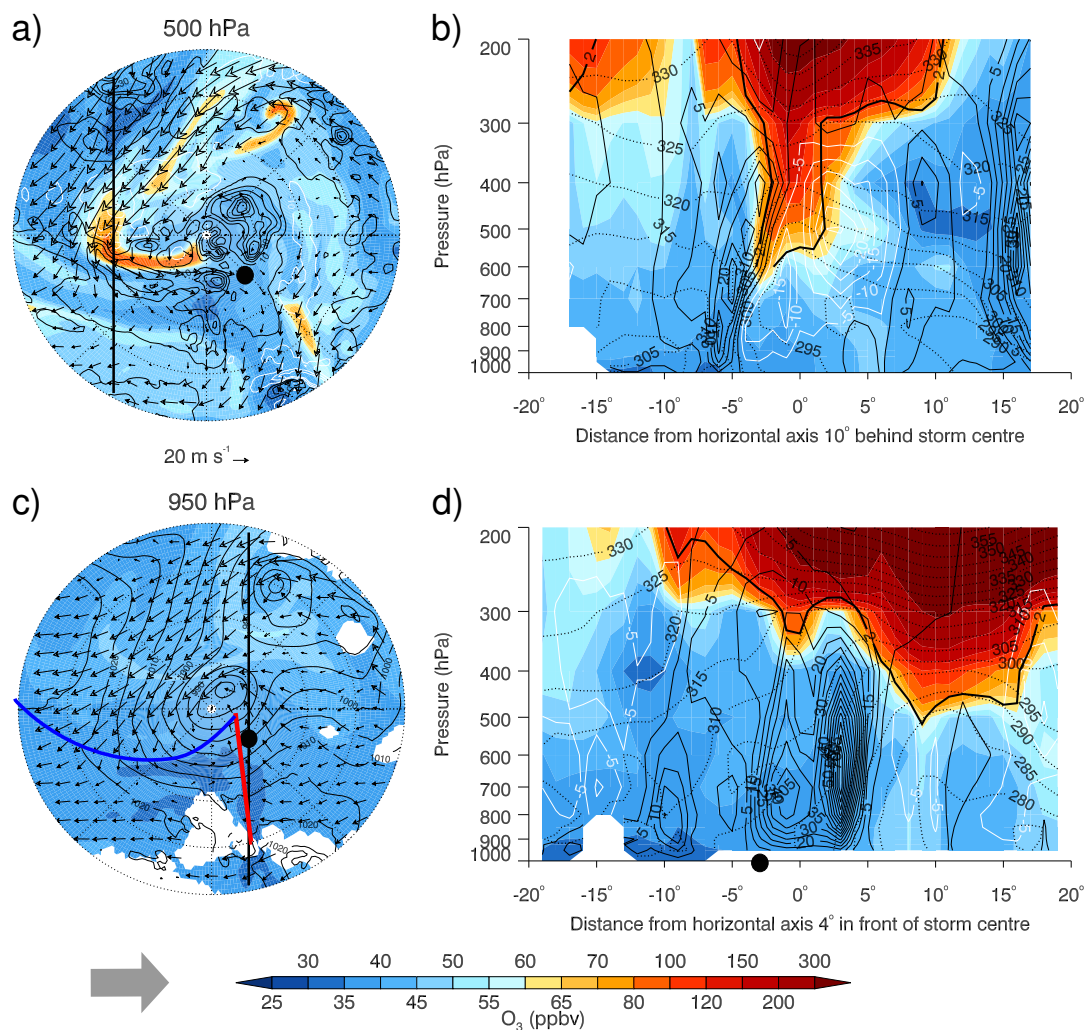

**Figure S1.** N1 cyclone on 4 March 2007 00UTC; similar to Fig. 6 except using MERRA-2 reanalysis data. Note, panel (c) is 950 hPa instead of 1000 hPa to minimize the missing data plotted. This occurs since the GEOS-5 model masks orography.



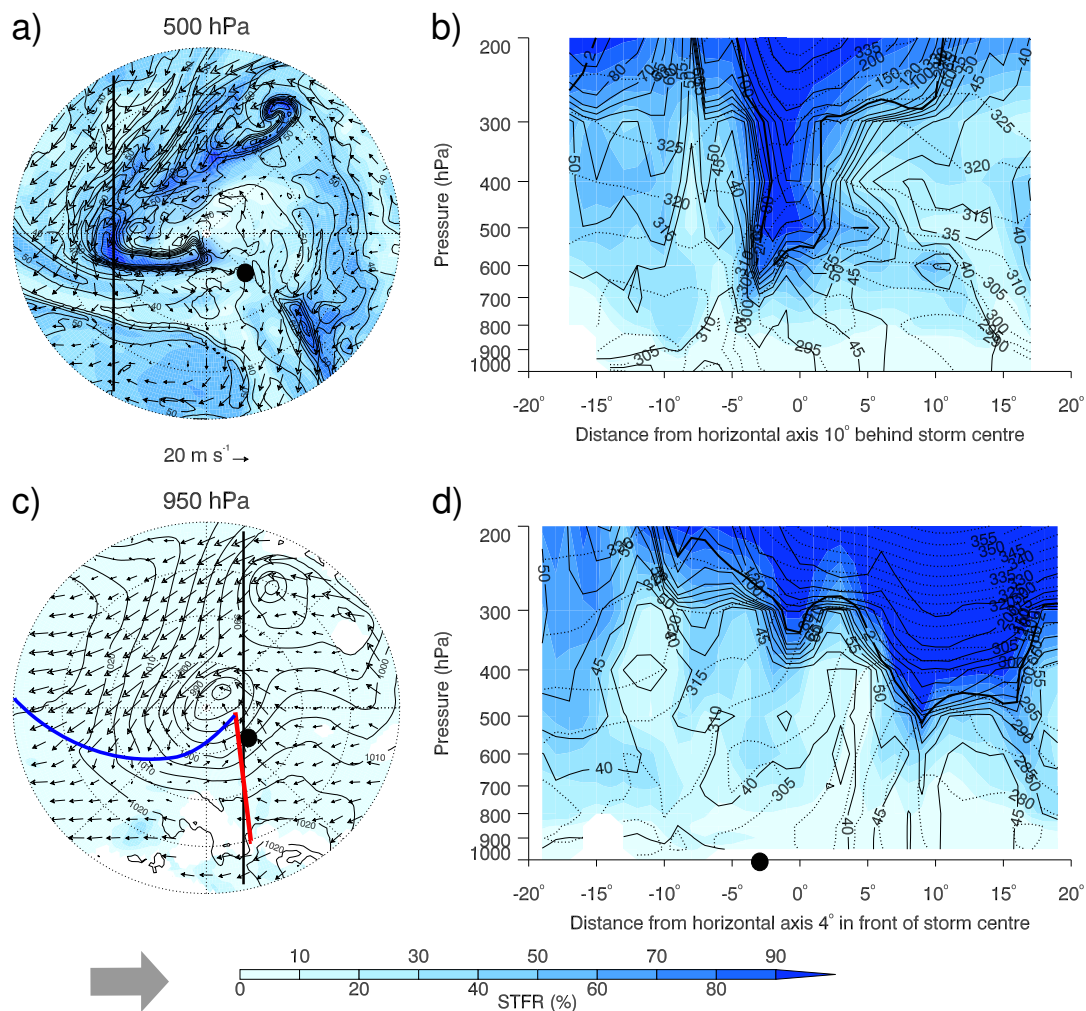

**Figure S2.** N1 cyclone on 4 March 2007 00UTC; similar to Fig. 6 except cyclone-centered STFR (color) and MERRA-2 O<sub>3</sub> (a,b,d, thin black contours; ppbv, increments matching Fig. 3 color bar) and SLP (c, black contours; 5 hPa increments). Figure also shows MERRA-2  $\theta_e$  (b,d), PV (b,d) and system relative winds (a,c). Note, panel (c) is 950 hPa instead of 1000 hPa to minimize the missing data plotted. This occurs since the GEOS-5 model masks orography.

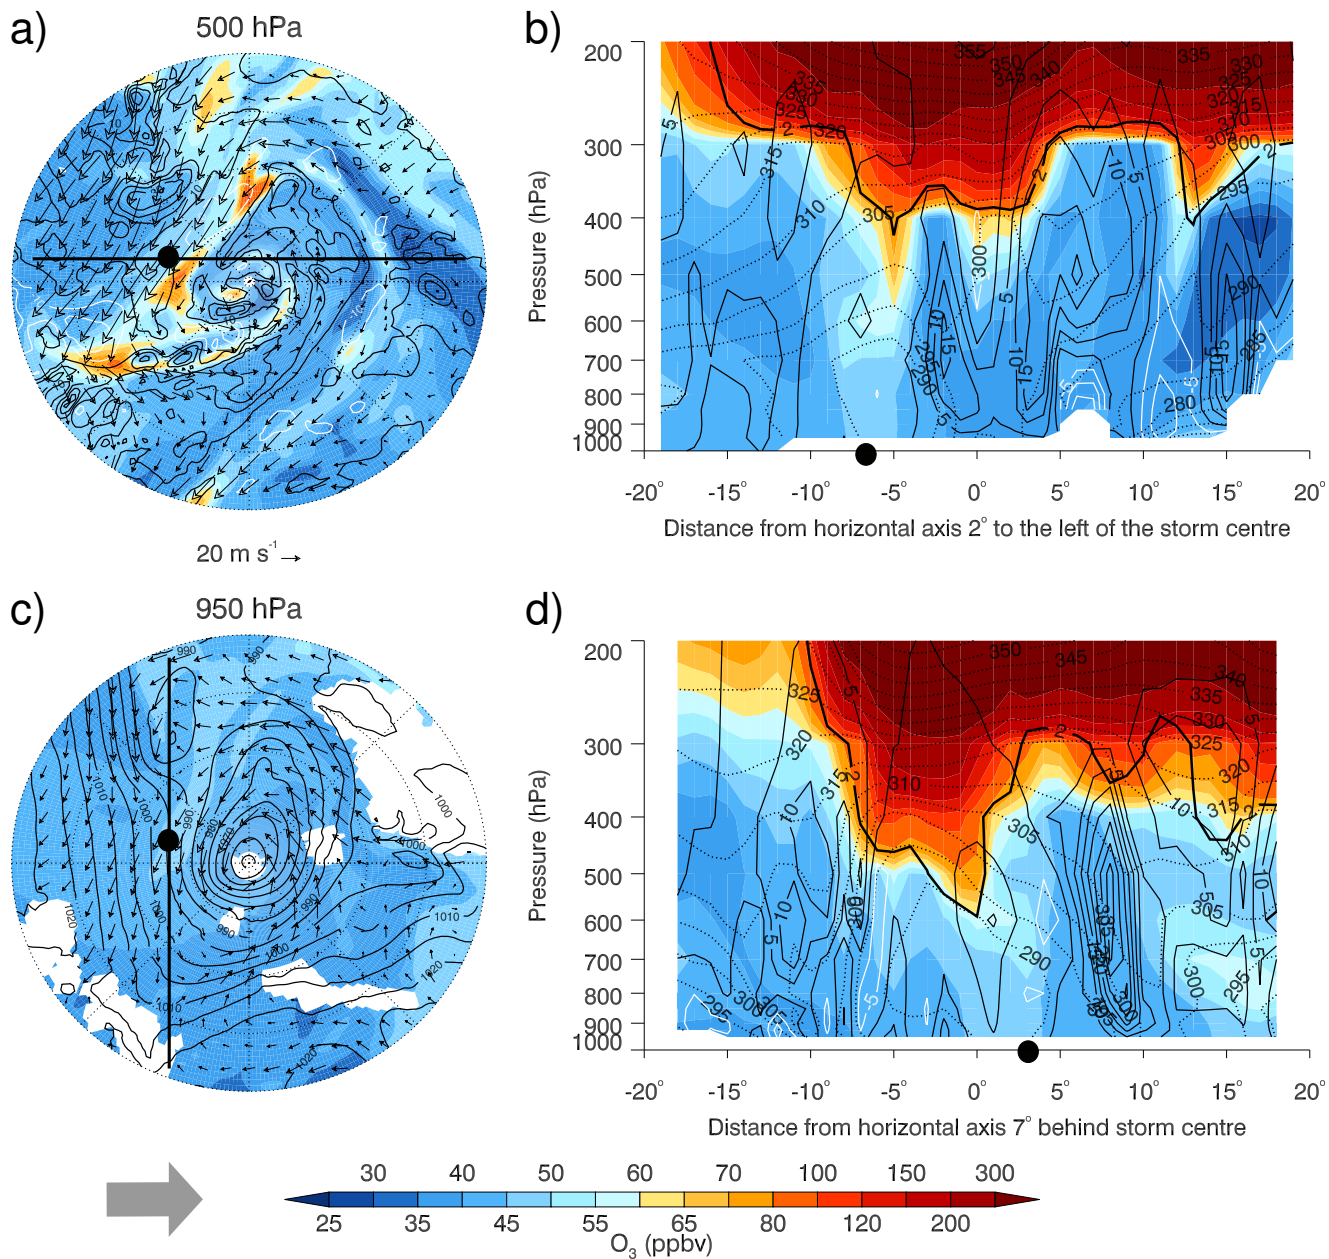

**Figure S3.** N1 cyclone on 5 March 2007 00UTC; similar to Fig. 7 except using MERRA-2 reanalysis data. Note, panel (c) is 950 hPa instead of 1000 hPa to minimize the missing data plotted. This occurs since the GEOS-5 model masks orography.

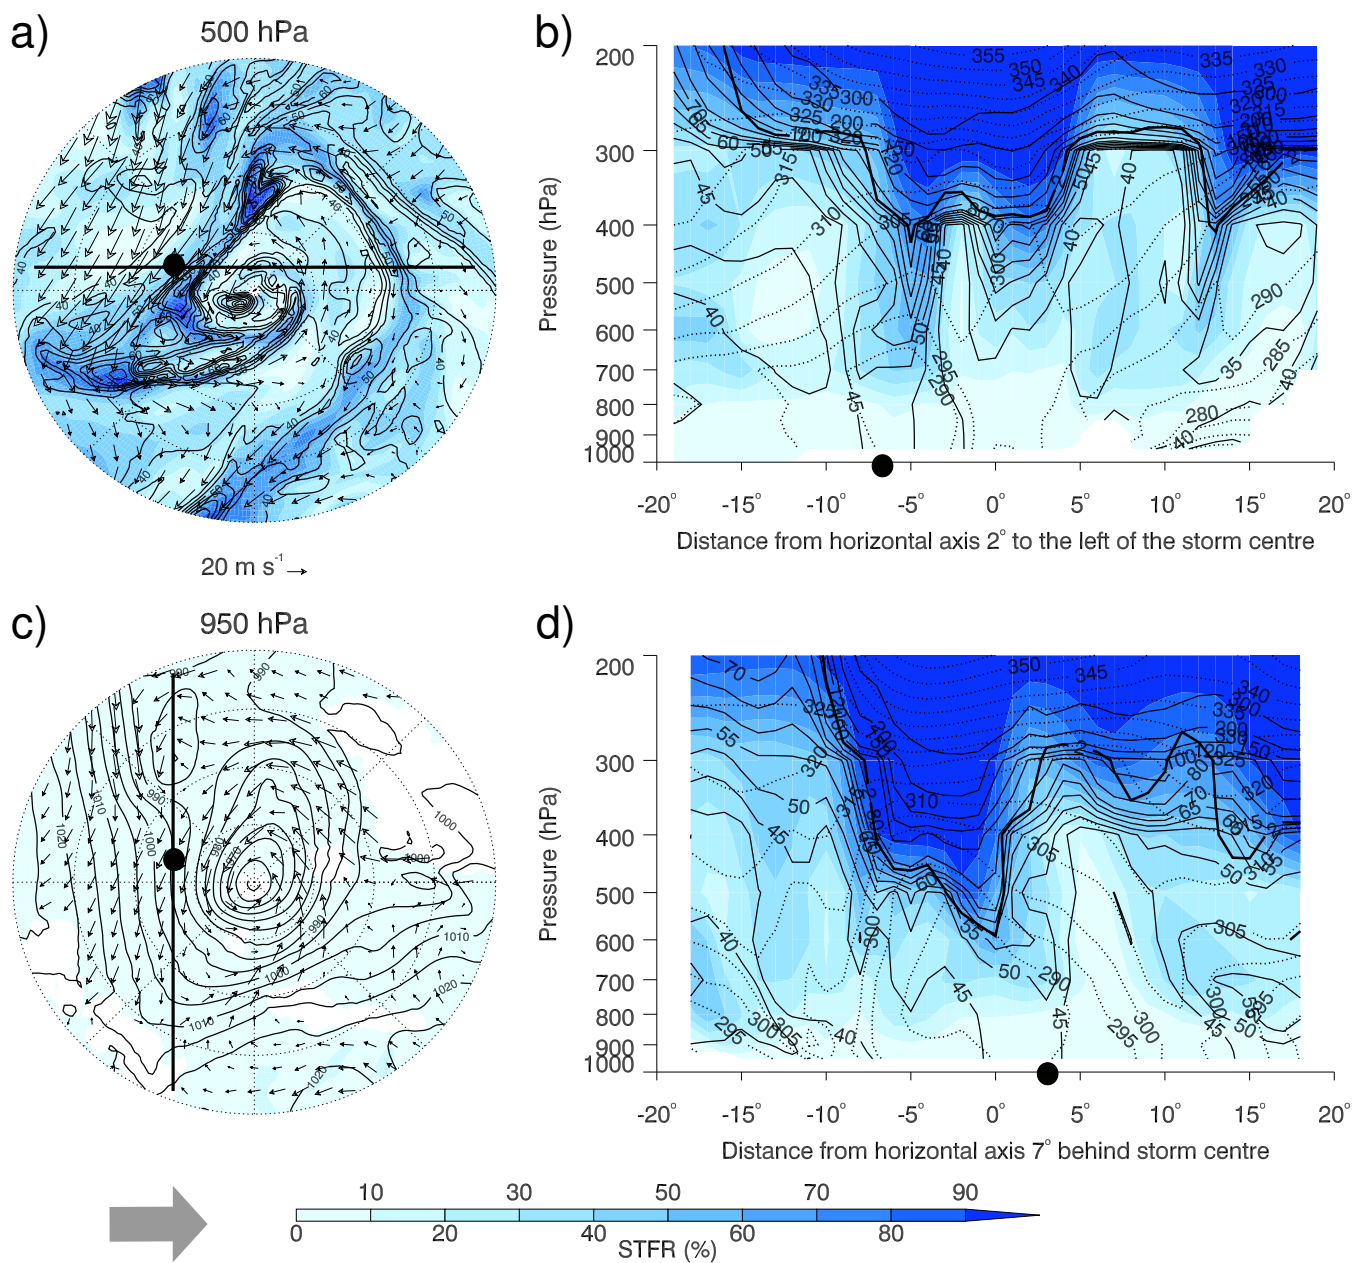

**Figure S4.** N1 cyclone on 5 March 2007 00UTC; similar to Fig. 7 except cyclone-centered STFR (color) and MERRA-2 O<sub>3</sub> (a,b,d, thin black contours; ppbv, increments matching Fig. 4 color bar) and SLP (c, black contours; 5 hPa increments). Figure also shows MERRA-2  $\theta_e$  (b,d), PV (b,d) and system relative winds (a,c). Note, panel (c) is 950 hPa instead of 1000 hPa to minimize the missing data plotted. This occurs since the GEOS-5 model masks orography.



## S2.2 S1 cyclone TFP and STFR

5 The frontal zones associated with the S1 cyclone on 25 April 2012 00UTC and 18UTC are shown using the TFP function in Fig. S5. Similar to the N1 cyclone, the front trailing from the center of the S1 cyclone toward the west is diagnosed as a cold front (Fig. S5a) and denoted as such in Fig. 10c. At this time the S1 cyclone has become occluded and the location of the warm front is not clear in the TFP values (Fig. S5a), however it is estimated in Fig. 10c in conjunction with the synoptic analysis chart (not shown). The decaying parent low can be identified by the elongated 1000 hPa MSLP contour to the east of S1 cyclone center in Fig. S5a, with no clear frontal zones. In Fig. S5b, 18 hours later, the frontal zones close to the S1 cyclone are not found at the cyclone center in the TFP values. A portion of the trailing cold front can be identified over  $10^\circ$  to the west of the cyclone center.

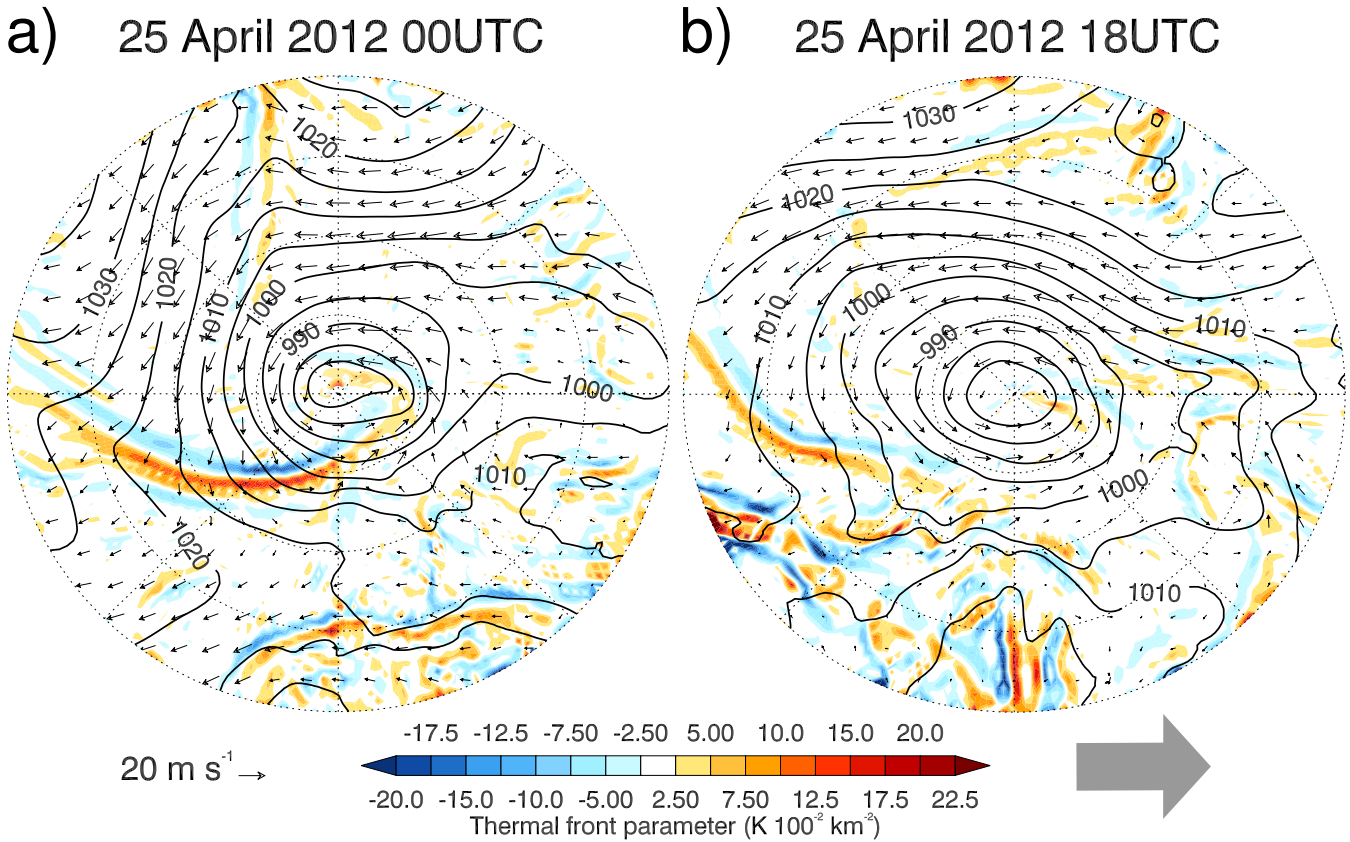

**Figure S5.** S1 cyclone-centered MSLP (solid black contours, 5 hPa contour intervals), 925 hPa system relative horizontal winds ( $20 \text{ m s}^{-1}$ , reference arrow), and 925 hPa thermal front parameter (color,  $2.5 \text{ K } 100^{-2} \text{ km}^{-2}$  intervals) on **a)** 25 April 2012 00UTC and **b)** 25 April 2012 18UTC. Radial dotted lines are plotted every  $45^\circ$  and dotted circles represent  $5^\circ$ ,  $10^\circ$ ,  $15^\circ$ , and  $20^\circ$  radii from cyclone center. The cyclone has been rotated in order that the direction of cyclone propagation is toward the right, indicated by the large grey arrow. N.b., geographical north for **a)** and **b)** is toward the top of the page.

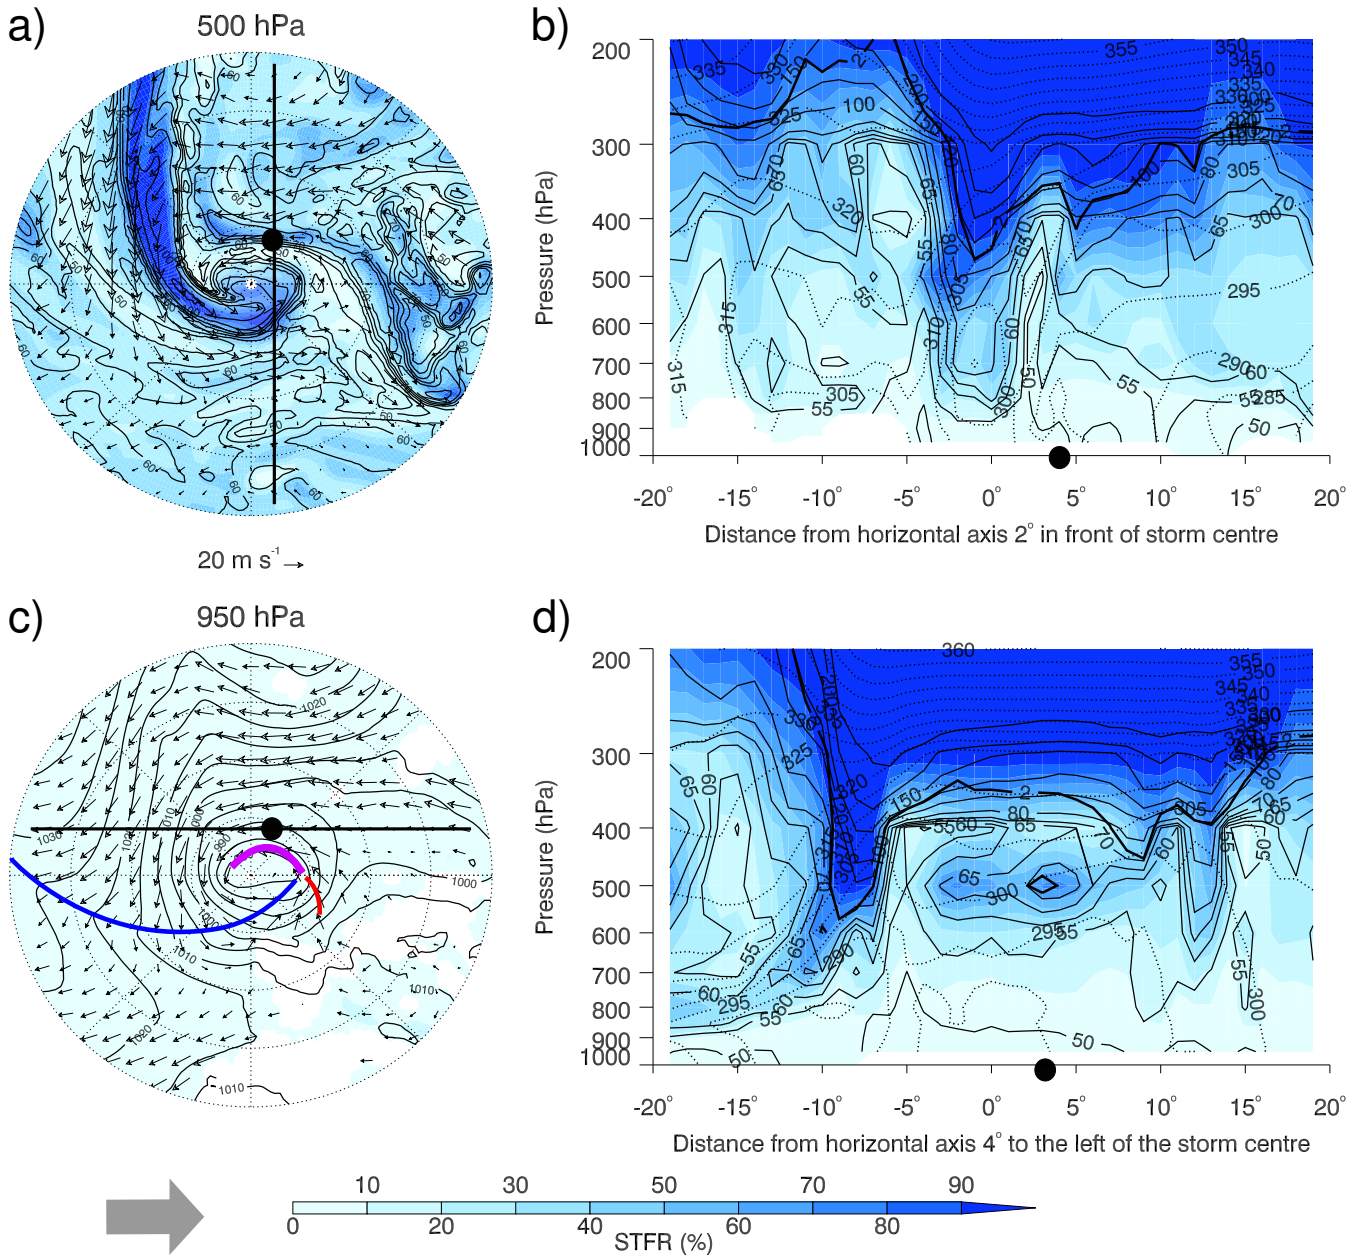

**Figure S6.** S1 cyclone on 25 April 2012 00UTC; similar to Fig. 10 except cyclone-centered STFR (color) and MERRA-2 O<sub>3</sub> (a,b,d, thin black contours; ppbv, increments matching Fig. 10 color bar) and SLP (c, black contours; 5 hPa increments). Figure also shows MERRA-2  $\theta_e$  (b,d), PV (b,d) and system relative winds (a,c). Note, panel (c) is 950 hPa instead of 1000 hPa to minimize the missing data plotted. This occurs since the GEOS-5 model masks orography.

### S2.3 N2 cyclone: synoptic conditions associated with high O<sub>3</sub> at Monte Velho

The N2 cyclone is a strong cyclone which passes north of Monte Velho and advects high O<sub>3</sub> to the monitoring station. It is also an example of a cyclone associated with low O<sub>3</sub> before high O<sub>3</sub> is observed at Monte Velho. Cyclogenesis of the N2 cyclone occurs off the east coast of Florida on 17 May 2006 at 12UTC (not shown) and then tracks northeastward. Downwind of the N2 cyclone are a series of low pressure systems across the NA region as well as a strong Azores High stretching over most of the NA (Fig. S7c, about a day after cyclogenesis, the N2 cyclone is located just south of Newfoundland). The large pressure gradient results in strong westerly winds at ~45° N throughout the troposphere (Fig. S7a–c). At 300 and 500 hPa, there are strong southerly winds on the western side of two upper-level ridges between 20° to 45° N. Between the two ridges there is an O<sub>3</sub>-rich (> 80 ppbv) streamer of air reaching south of 30° N (Fig. S7a and b), resulting in high O<sub>3</sub> at lower latitudes that can descend within the DI of the low pressure systems or subside in the Azores high pressure system.

Over the next two and half days, the N2 cyclone continues to move northeastward towards the UK following the upper-level jet stream, the narrow region of relatively strong winds at 300 hPa (Fig. S7a and S8a). During this time, a high pressure system from over the Labrador Sea moves in behind the N2 cyclone, blocking further cyclones and pollutants from being transported from North America across the NA (Fig. S8c). The high pressure block in the western NA is similar to the S1 synoptic conditions presented in Sect. 4.2.2.

In Fig. S8c, the cold front (blue line) associated with the N2 cyclone is approaching Spain from the northeast. The cold front can be identified at 1000 hPa in the wind field, where the wind at the surface near the Iberian Peninsula diverges in different directions, and in the MSLP field where the gradient in the isobars decreases (Fig. S8c). On 21 May 2006 at 06UTC, low O<sub>3</sub> value is observed at Monte Velho. The low O<sub>3</sub> arrives at Monte Velho from the southwest and flows anticyclonically around the Azores High over the NA and northward parallel to the N2 cyclone's cold front as part of the WCB (Fig. S8c). This low O<sub>3</sub> wraps around the cyclone center as the N2 cyclone reaches maximum vorticity (Fig. S8c). It can be noted that the composition near the cyclone center impacts the O<sub>3</sub> observations at Mace Head, located ~15° N north of Monte Velho. The low O<sub>3</sub> within the cyclone center results in persistent low O<sub>3</sub> at Mace Head (O<sub>3</sub> < 40 ppbv) as the N2 cyclone tracks over the UK.

High O<sub>3</sub> (> 45 ppbv) first occurred at Monte Velho on 22 May 2006 06UTC (Fig. S9, about five days after the N2 cyclogenesis (Fig. S9d). Prior to the high O<sub>3</sub> events at Monte Velho, there is an increase of O<sub>3</sub> over time in the mid- to low troposphere due to the low pressure systems in the NA bringing O<sub>3</sub>-rich air toward lower levels within their respective DI airstreams (Figs. S7b, S8b, and S9b and c). At the time high O<sub>3</sub> is reported at Monte Velho, the N2 cyclone has tracked over the UK (N2 located at 52° N, 2° W, Fig. S9d) and the trailing cold front (blue line) has passed over Monte Velho. The high O<sub>3</sub> at the surface is likely associated with stratospheric O<sub>3</sub> descending within the DI of the N2 cyclone as well as high O<sub>3</sub> subsiding on the eastern side of the Azores High (Fig. S9a–c). High O<sub>3</sub> persisted for most of the period until the end of the month as N2 continued to track north, associated with subsequent descent of O<sub>3</sub>-rich air over the Iberian Peninsula behind the front and subsidence within the high pressure (not shown).

To summarize, during the life cycle of the N2 cyclone, successive low pressure systems in the region interacting with the O<sub>3</sub>-rich stratospheric air lead to a build up of high levels of O<sub>3</sub> in the mid- to lower troposphere. There is descent of both stratospheric air as well as the residual high levels of O<sub>3</sub> within the DI airstream of the N2 cyclone, reaching the surface over the Iberian Peninsula. As was seen in the N1 cyclone, low O<sub>3</sub> was first reported at the observation station as clean subtropical air influenced the site, prior to the cold front passing over the station. Once the cold front passed over the station, there was a substantial increase in the O<sub>3</sub> recorded. At the time of maximum intensity of the N2 cyclone, the high pressure system was in a prominent position over the western NA, blocking potential transport from North America. Since the synoptic-scale circulation is similar to the life cycle of the S2 cyclone, the cyclone-centered analysis has not been repeated for the N2 cyclone.

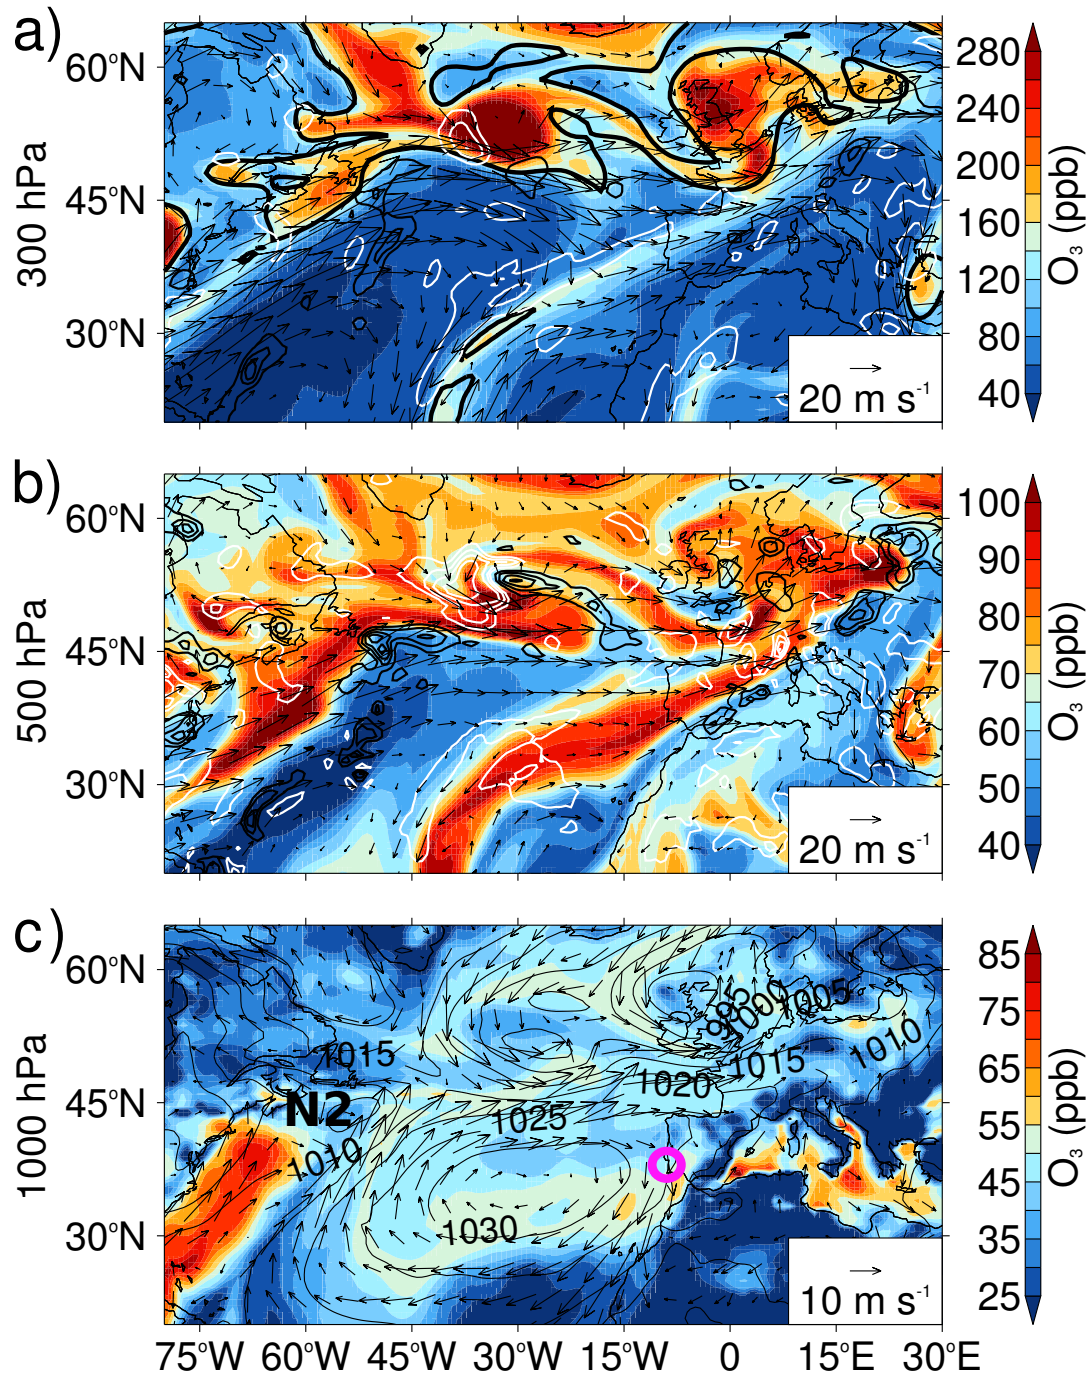

**Figure S7.** Synoptic conditions and  $O_3$  distribution for the N2 cyclone (c; 41° N, 58° W) on the 18 May 2006 at 18 UTC, 2.5 days before maximum  $\zeta_{850}$  was reached.  $O_3$  (color; note different scales are used) is shown on three levels: **a)** 300 hPa, **b)** 500 hPa, and **c)** 1000 hPa. In addition, MSLP (c; solid contours, 5 hPa intervals),  $\omega$  (a and b; black contours for positive values indicating ascent, 10 hPa h<sup>-1</sup> contour intervals, and white contours for descent, -5 hPa h<sup>-1</sup> contour intervals), and 2 PVU isosurface (a; thick contour) are shown. Monte Velho indicated by pink open circle (c).



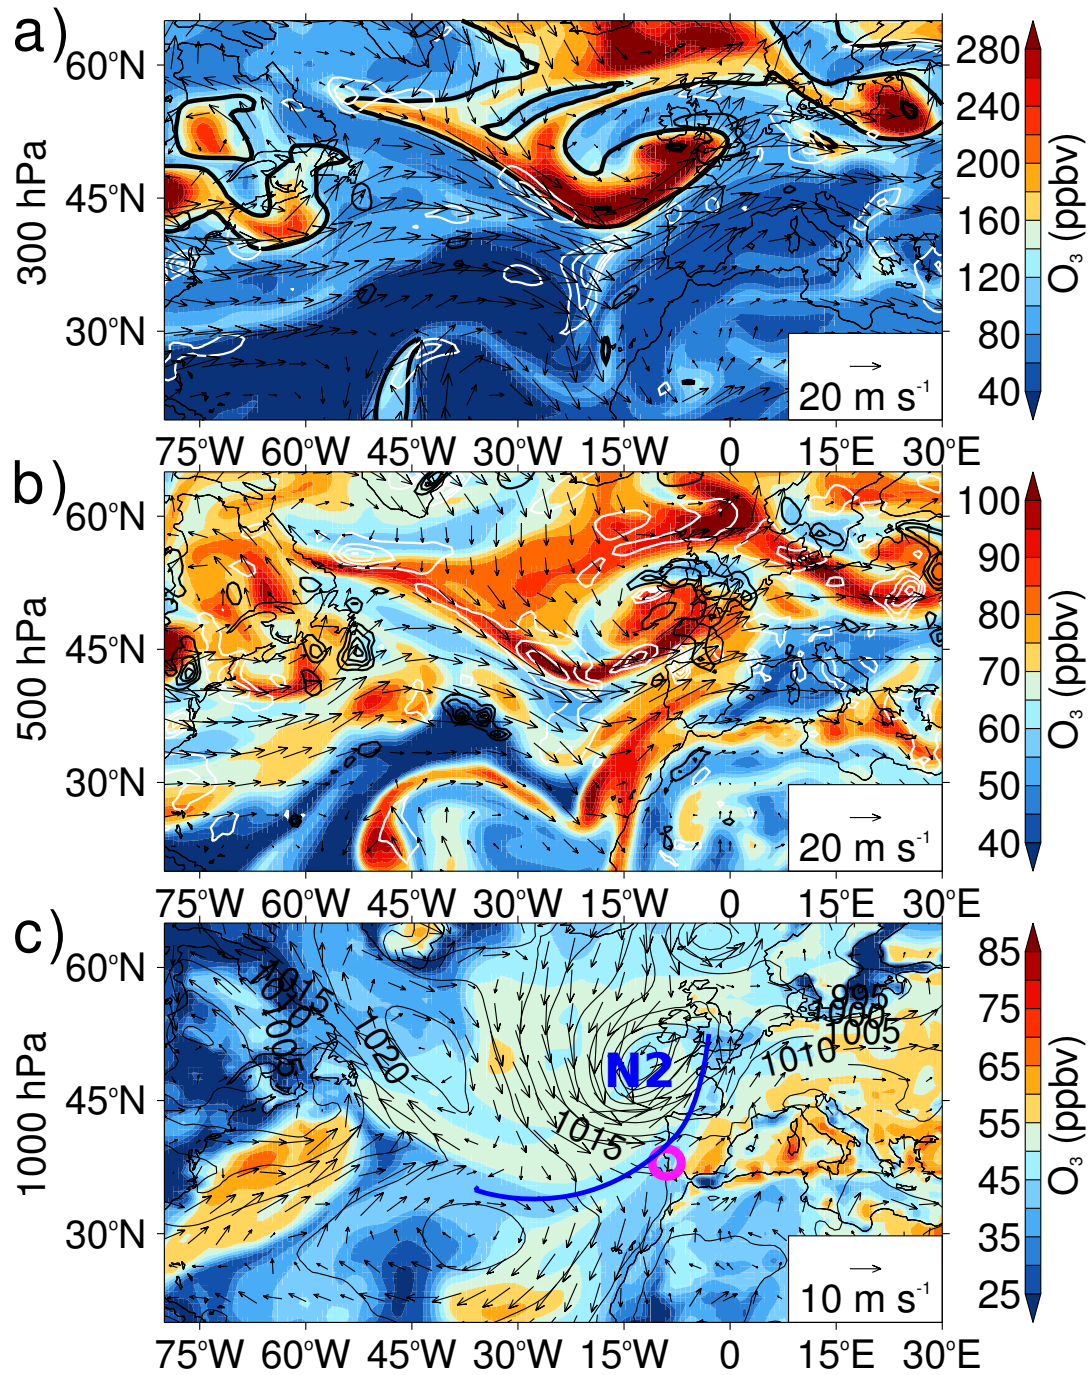

**Figure S8.** Similar to Fig. S7 for the N2 cyclone (c; 48° N, 15° W) except 2.5 days later on 21 May 2006 06UTC, at the time of maximum  $\zeta_{850}$ . Monte Velho, indicated by pink open circle (c), is located to the southeast of an approaching cold front (approximate location indicated by blue line). Low O<sub>3</sub> was observed at Monte Velho.



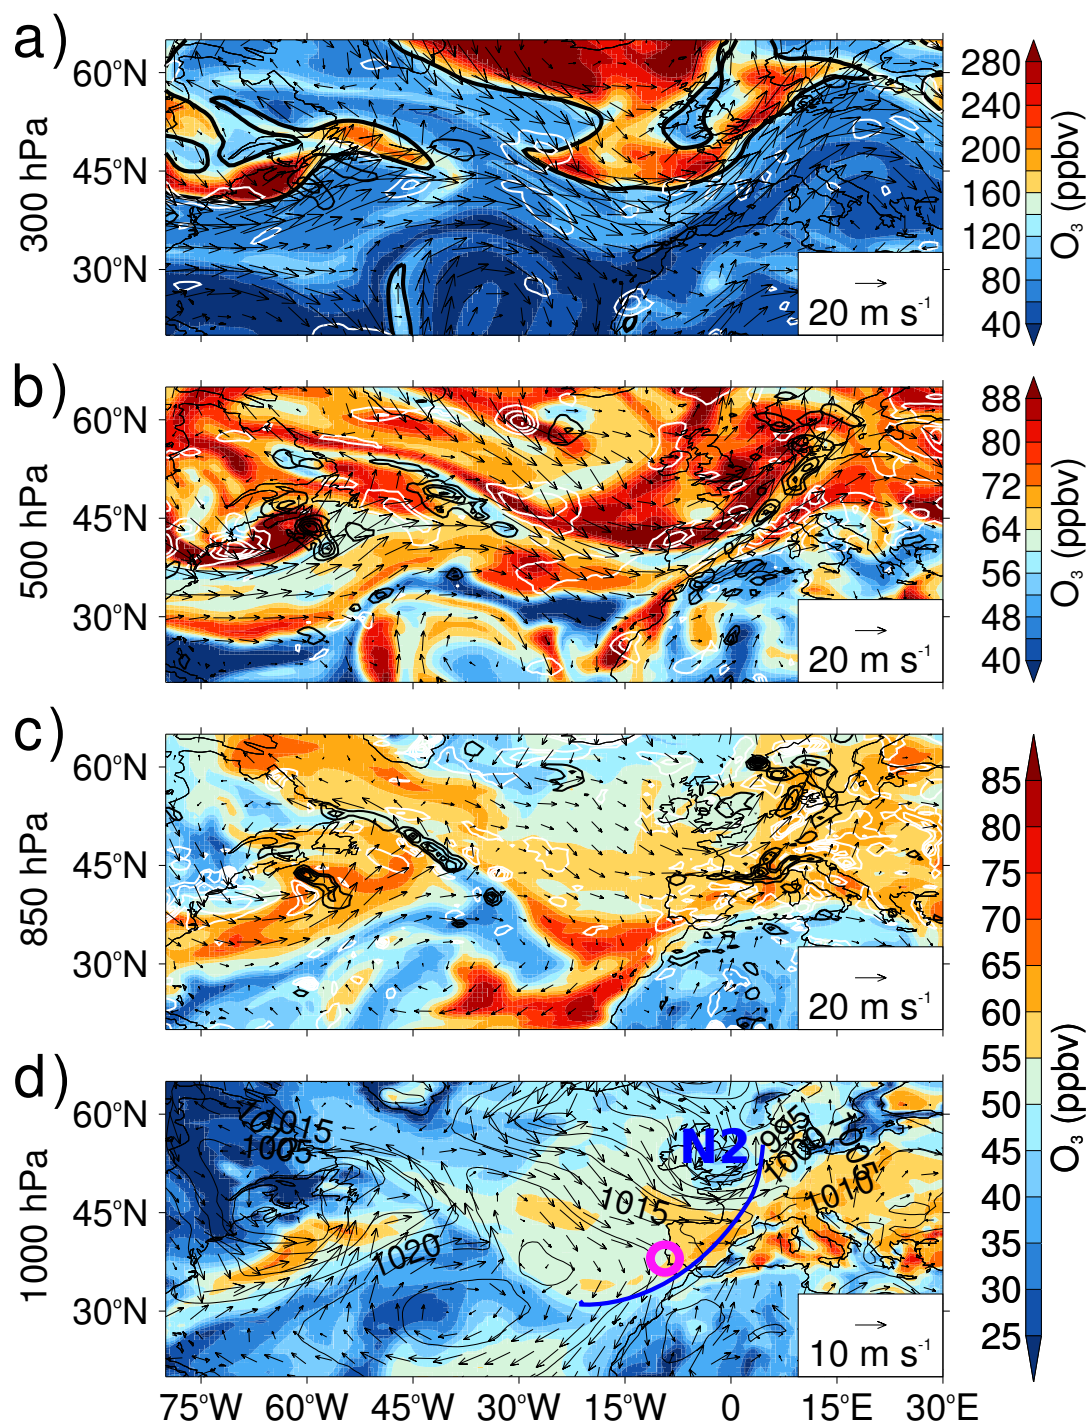

**Figure S9.** Similar to Fig. S8 for the N2 cyclone (c; 52° N, 2° W) except 24 hours later, on the 22 May 2006 06UTC, 18 hours after maximum  $\zeta_{850}$ . Monte Velho, indicated by pink open circle (c), is located to the northwest of an passing cold front (approximate location indicated by blue line). High  $O_3$  was reported at Monte Velho. Four levels are shown: **a)** 300 hPa, **b)** 500 hPa, **c)** 850 hPa and **d)** 1000 hPa.
